# Supplementary material
Source: MDPI journal article supplement (https://www.mdpi.com/2571-6131/5/4/87)
Supplement: s1 [file s1]

Archive with 1 entries (1 files):
- ceramics-2029046-supplementary.pdf
